# Supplementary material for: Dairy Food Intake Is Not Associated with Measures of Bone Microarchitecture in Men and Women: The Framingham Osteoporosis Study
Source: MDPI journal article supplement (doi:10.3390/nu13113940), 2021-11-04
Supplement: s1 [file s1]

## Supplementary Tables

**Table S1.** Association of dairy food intake with measures of tibial HR-pQCT in men and women from the Framingham Offspring Study.

| HR-pQCT Measures                       | Dairy Foods (Servings/wk) | Tibia <sup>1</sup> |      |      |                |      |      | Tibia <sup>2</sup> |      |      |                |      |        |
|----------------------------------------|---------------------------|--------------------|------|------|----------------|------|------|--------------------|------|------|----------------|------|--------|
|                                        |                           | Male (n=532)       |      |      | Female (n=694) |      |      | Male (n=532)       |      |      | Female (n=694) |      |        |
|                                        |                           | beta               | SE   | P    | beta           | SE   | P    | beta               | SE   | P    | beta           | SE   | P      |
| Cortical vBMD, mgHA/cm <sup>3</sup>    | Milk                      | -0.85              | 2.96 | 0.77 | 0.07           | 2.79 | 0.98 | -1.66              | 2.68 | 0.53 | 2.52           | 2.44 | 0.30   |
|                                        | Yogurt                    | -2.14              | 3.44 | 0.53 | 0.04           | 3.20 | 0.99 | -1.51              | 3.11 | 0.63 | -2.56          | 2.84 | 0.37   |
|                                        | Cheese                    | -2.40              | 3.61 | 0.51 | -4.35          | 3.51 | 0.22 | -2.14              | 3.26 | 0.51 | -9.42          | 3.10 | <0.01* |
|                                        | Milk+Yogurt               | -0.61              | 2.97 | 0.84 | -0.04          | 3.05 | 0.99 | -1.83              | 2.69 | 0.50 | 0.57           | 2.67 | 0.83   |
|                                        | Milk+Yogurt+Cheese        | -0.58              | 0.48 | 0.22 | -0.42          | 0.51 | 0.42 | -0.65              | 0.43 | 0.13 | -0.43          | 0.45 | 0.34   |
| Cortical thickness, mm                 | Milk                      | 0.01               | 0.01 | 0.62 | 0.00           | 0.01 | 0.99 | 0.01               | 0.01 | 0.59 | 0.01           | 0.01 | 0.29   |
|                                        | Yogurt                    | -0.02              | 0.02 | 0.13 | 0.01           | 0.01 | 0.50 | -0.02              | 0.01 | 0.27 | 0.00           | 0.01 | 0.85   |
|                                        | Cheese                    | 0.00               | 0.01 | 0.92 | 0.00           | 0.01 | 0.87 | 0.00               | 0.01 | 0.84 | -0.01          | 0.01 | 0.17   |
|                                        | Milk+Yogurt               | 0.00               | 0.01 | 0.87 | 0.00           | 0.01 | 0.82 | 0.00               | 0.01 | 0.87 | 0.01           | 0.01 | 0.52   |
|                                        | Milk+Yogurt+Cheese        | 0.00               | 0.00 | 0.91 | 0.00           | 0.00 | 0.40 | 0.00               | 0.00 | 0.85 | 0.00           | 0.00 | 0.31   |
| Trabecular vBMD, mg HA/cm <sup>3</sup> | Milk                      | 2.57               | 1.58 | 0.10 | 0.28           | 1.32 | 0.83 | 2.31               | 1.54 | 0.13 | 0.74           | 1.26 | 0.56   |
|                                        | Yogurt                    | 4.16               | 2.05 | 0.04 | -2.83          | 1.52 | 0.06 | 4.86               | 2.00 | 0.02 | -1.43          | 1.52 | 0.35   |
|                                        | Cheese                    | 1.79               | 1.96 | 0.36 | -1.16          | 1.64 | 0.48 | 1.21               | 1.90 | 0.53 | -2.27          | 1.60 | 0.16   |
|                                        | Milk+Yogurt               | 2.19               | 1.58 | 0.17 | -0.47          | 1.45 | 0.74 | 2.21               | 1.55 | 0.15 | 0.04           | 1.40 | 0.98   |
|                                        | Milk+Yogurt+Cheese        | 0.34               | 0.26 | 0.19 | -0.25          | 0.24 | 0.30 | 0.38               | 0.25 | 0.13 | -0.31          | 0.23 | 0.18   |
|                                        | Milk                      | 0.00               | 0.02 | 0.93 | 0.01           | 0.01 | 0.60 | 0.00               | 0.01 | 0.79 | 0.01           | 0.01 | 0.26   |
|                                        | Yogurt                    | 0.02               | 0.02 | 0.21 | -0.03          | 0.02 | 0.04 | 0.03               | 0.02 | 0.10 | -0.01          | 0.02 | 0.51   |

|                                 |                         |        |       |      |        |       |      |       |       |      |        |       |      |
|---------------------------------|-------------------------|--------|-------|------|--------|-------|------|-------|-------|------|--------|-------|------|
| Trabecular<br>num-<br>ber,1/mm  | Cheese                  | 0.03   | 0.02  | 0.10 | 0.01   | 0.02  | 0.59 | 0.02  | 0.02  | 0.33 | -0.01  | 0.02  | 0.50 |
|                                 | Milk+Yogurt             | 0.00   | 0.02  | 0.88 | 0.01   | 0.02  | 0.67 | 0.00  | 0.01  | 0.98 | 0.02   | 0.01  | 0.28 |
|                                 | Milk+Yo-<br>gurt+Cheese | 0.00   | 0.00  | 0.73 | 0.00   | 0.00  | 0.57 | 0.00  | 0.00  | 0.88 | 0.00   | 0.00  | 0.35 |
| Estimated<br>failure load,<br>N | Milk                    | 29.52  | 55.10 | 0.59 | 28.97  | 33.76 | 0.39 | 12.41 | 49.87 | 0.80 | 52.81  | 28.34 | 0.06 |
|                                 | Yogurt                  | 24.97  | 70.59 | 0.72 | -12.33 | 38.79 | 0.75 | 40.03 | 63.70 | 0.53 | 16.76  | 33.62 | 0.62 |
|                                 | Cheese                  | 118.94 | 66.58 | 0.07 | 26.64  | 42.22 | 0.53 | 81.54 | 60.46 | 0.80 | -55.26 | 36.10 | 0.13 |
|                                 | Milk+Yogurt             | 22.39  | 54.77 | 0.68 | 25.54  | 36.95 | 0.49 | 15.89 | 49.72 | 0.75 | 34.97  | 31.20 | 0.26 |
|                                 | Milk+Yo-<br>gurt+Cheese | -0.85  | 2.96  | 0.77 | 0.07   | 2.79  | 0.98 | 3.40  | 8.05  | 0.67 | -5.21  | 5.24  | 0.32 |

<sup>1</sup>Crude models

<sup>2</sup>Models adjusted for age, height, weight, current smoking, energy intake, calcium supplement use, vitamin D supplement use, menopause status/estrogen use (in women alone), physical activity, and multivitamin use.

\* *P*-value < 0.003 was considered statistically significant.

**Table S2.** Association of dairy food intake (serv/wk) with measures of HR-pQCT in the combined sample of men and women from the Framingham Offspring Study.

| HR-pQCT Measures                       | Dairy Foods (servings/wk) | Radius (n=1140) |       |          | Tibia (n=1126) |       |          |
|----------------------------------------|---------------------------|-----------------|-------|----------|----------------|-------|----------|
|                                        |                           | beta            | SE    | P-value* | beta           | SE    | P-value* |
| Cortical vBMD, mgHA/cm <sup>3</sup>    | Milk                      | 1.19            | 1.61  | 0.46     | 0.58           | 1.83  | 0.75     |
|                                        | Yogurt                    | 0.53            | 1.91  | 0.78     | -2.37          | 2.13  | 0.27     |
|                                        | Cheese                    | -5.37           | 2.02  | 0.01     | -5.82          | 2.28  | 0.01     |
|                                        | Milk+Yogurt               | 1.45            | 1.71  | 0.40     | -0.83          | 1.93  | 0.67     |
|                                        | Milk+Yogurt+Cheese        | -0.26           | 0.29  | 0.36     | -0.56          | 0.32  | 0.08     |
| Cortical thickness, mm                 | Milk                      | 0.01            | 0.01  | 0.06     | 0.01           | 0.01  | 0.29     |
|                                        | Yogurt                    | 0.00            | 0.01  | 0.53     | -0.01          | 0.01  | 0.48     |
|                                        | Cheese                    | -0.01           | 0.01  | 0.22     | -0.01          | 0.01  | 0.49     |
|                                        | Milk+Yogurt               | 0.01            | 0.01  | 0.21     | 0.00           | 0.01  | 0.64     |
|                                        | Milk+Yogurt+Cheese        | 0.00            | 0.00  | 0.45     | 0.00           | 0.00  | 0.53     |
| Trabecular vBMD, mg HA/cm <sup>3</sup> | Milk                      | 1.60            | 1.06  | 0.13     | 1.41           | 0.98  | 0.15     |
|                                        | Yogurt                    | 0.12            | 1.26  | 0.93     | 0.63           | 1.20  | 0.60     |
|                                        | Cheese                    | -0.07           | 1.33  | 0.96     | -0.64          | 1.23  | 0.60     |
|                                        | Milk+Yogurt               | 0.90            | 1.13  | 0.42     | 1.05           | 1.04  | 0.31     |
|                                        | Milk+Yogurt+Cheese        | 0.06            | 0.19  | 0.74     | 0.02           | 0.17  | 0.89     |
| Trabecular number, 1/mm                | Milk                      | 0.01            | 0.01  | 0.59     | 0.01           | 0.01  | 0.50     |
|                                        | Yogurt                    | -0.02           | 0.01  | 0.18     | 0.00           | 0.01  | 0.87     |
|                                        | Cheese                    | 0.00            | 0.01  | 0.87     | 0.00           | 0.01  | 0.88     |
|                                        | Milk+Yogurt               | 0.00            | 0.01  | 0.93     | 0.01           | 0.01  | 0.46     |
|                                        | Milk+Yogurt+Cheese        | 0.00            | 0.00  | 0.52     | 0.00           | 0.00  | 0.39     |
| Estimated failure load, N              | Milk                      | 22.73           | 13.10 | 0.08     | 35.78          | 26.66 | 0.18     |
|                                        | Yogurt                    | -9.59           | 15.31 | 0.53     | 19.43          | 31.33 | 0.54     |

---

|                    |       |       |      |       |       |      |
|--------------------|-------|-------|------|-------|-------|------|
| Cheese             | 10.40 | 16.56 | 0.53 | 8.14  | 33.13 | 0.81 |
| Milk+Yogurt        | 10.73 | 13.92 | 0.44 | 23.53 | 28.06 | 0.40 |
| Milk+Yogurt+Cheese | -2.14 | 2.32  | 0.36 | -1.53 | 4.62  | 0.74 |

---

Models adjusted for age, sex, height, weight, current smoking, energy intake, calcium supplement use, vitamin D supplement use, physical activity, and multi-vitamin use.

\* *P*-value < 0.003 was considered statistically significant.

**Table S3.** Association of dairy food intake with measures of HR-pQCT stratified by age in participants from the Framingham Offspring Study.

| HR-pQCT Measures                       | Dairy Foods (serv-ings/wk) | Radius                  |       |         |                         |       |         | Tibia                   |       |         |                         |       |         |
|----------------------------------------|----------------------------|-------------------------|-------|---------|-------------------------|-------|---------|-------------------------|-------|---------|-------------------------|-------|---------|
|                                        |                            | Age≤60 years<br>(n=387) |       |         | Age>60 years<br>(n=753) |       |         | Age≤60 years<br>(n=395) |       |         | Age>60 years<br>(n=831) |       |         |
|                                        |                            | beta                    | SE    | P-value |
| Cortical vBMD, mgHA/cm <sup>3</sup>    | Milk                       | 0.32                    | 2.46  | 0.90    | 1.44                    | 2.11  | 0.50    | 0.27                    | 2.91  | 0.93    | 0.48                    | 2.33  | 0.84    |
|                                        | Yogurt                     | -2.05                   | 2.96  | 0.49    | 2.02                    | 2.48  | 0.42    | -4.38                   | 3.34  | 0.19    | -1.57                   | 2.72  | 0.57    |
|                                        | Cheese                     | -1.38                   | 3.19  | 0.67    | -7.40                   | 2.59  | 0.01    | -2.03                   | 3.68  | 0.58    | -7.82                   | 2.85  | 0.01    |
|                                        | Milk+Yogurt                | -0.85                   | 2.76  | 0.76    | 2.35                    | 2.17  | 0.28    | -2.27                   | 3.21  | 0.48    | -0.39                   | 2.40  | 0.87    |
|                                        | Milk+Yogurt+Cheese         | -0.30                   | 0.45  | 0.51    | -0.28                   | 0.36  | 0.45    | -0.36                   | 0.53  | 0.50    | -0.70                   | 0.39  | 0.07    |
| Cortical thickness, mm                 | Milk                       | 0.01                    | 0.01  | 0.12    | 0.01                    | 0.01  | 0.20    | 0.01                    | 0.01  | 0.40    | 0.01                    | 0.01  | 0.31    |
|                                        | Yogurt                     | -0.01                   | 0.01  | 0.47    | 0.00                    | 0.01  | 0.83    | 0.00                    | 0.01  | 0.85    | -0.01                   | 0.01  | 0.41    |
|                                        | Cheese                     | 0.00                    | 0.01  | 0.83    | -0.01                   | 0.01  | 0.09    | 0.01                    | 0.01  | 0.59    | -0.01                   | 0.01  | 0.22    |
|                                        | Milk+Yogurt                | 0.01                    | 0.01  | 0.57    | 0.01                    | 0.01  | 0.21    | 0.00                    | 0.01  | 0.77    | 0.01                    | 0.01  | 0.51    |
|                                        | Milk+Yogurt+Cheese         | 0.00                    | 0.00  | 0.55    | 0.00                    | 0.00  | 0.71    | 0.00                    | 0.00  | 0.32    | 0.00                    | 0.00  | 0.96    |
| Trabecular vBMD, mg HA/cm <sup>3</sup> | Milk                       | 2.07                    | 1.78  | 0.25    | 1.05                    | 1.32  | 0.43    | 1.59                    | 1.76  | 0.36    | 1.14                    | 1.18  | 0.34    |
|                                        | Yogurt                     | -2.58                   | 2.07  | 0.21    | 1.38                    | 1.59  | 0.39    | -2.47                   | 2.05  | 0.23    | 1.91                    | 1.47  | 0.20    |
|                                        | Cheese                     | -0.42                   | 2.28  | 0.86    | 0.49                    | 1.63  | 0.76    | -0.84                   | 2.20  | 0.70    | -0.17                   | 1.46  | 0.91    |
|                                        | Milk+Yogurt                | 0.01                    | 1.95  | 0.99    | 0.90                    | 1.38  | 0.51    | 1.07                    | 1.92  | 0.58    | 0.82                    | 1.23  | 0.51    |
|                                        | Milk+Yogurt+Cheese         | -0.16                   | 0.33  | 0.62    | 0.10                    | 0.23  | 0.66    | -0.07                   | 0.32  | 0.82    | 0.03                    | 0.20  | 0.88    |
| Trabecular number, 1/mm                | Milk                       | 0.00                    | 0.02  | 0.92    | 0.01                    | 0.01  | 0.52    | 0.00                    | 0.02  | 0.87    | 0.01                    | 0.01  | 0.49    |
|                                        | Yogurt                     | -0.04                   | 0.02  | 0.02    | 0.00                    | 0.02  | 0.87    | -0.01                   | 0.02  | 0.44    | 0.00                    | 0.01  | 0.51    |
|                                        | Cheese                     | -0.02                   | 0.02  | 0.21    | 0.01                    | 0.02  | 0.49    | 0.01                    | 0.02  | 0.76    | 0.00                    | 0.01  | 0.94    |
|                                        | Milk+Yogurt                | -0.03                   | 0.02  | 0.08    | 0.01                    | 0.01  | 0.43    | 0.00                    | 0.02  | 0.85    | 0.00                    | 0.01  | 0.42    |
|                                        | Milk+Yogurt+Cheese         | -0.01                   | 0.00  | 0.07    | 0.00                    | 0.00  | 0.77    | 0.00                    | 0.00  | 0.42    | 0.00                    | 0.00  | 0.49    |
| Estimated failure load, N              | Milk                       | 8.25                    | 21.65 | 0.70    | 23.68                   | 16.34 | 0.15    | 17.11                   | 44.30 | 0.70    | 39.90                   | 33.27 | 0.23    |
|                                        | Yogurt                     | -14.16                  | 25.38 | 0.58    | -8.89                   | 19.02 | 0.64    | -0.63                   | 50.26 | 0.99    | 29.41                   | 39.62 | 0.46    |
|                                        | Cheese                     | 9.69                    | 27.75 | 0.73    | 17.07                   | 20.30 | 0.40    | 29.43                   | 55.93 | 0.60    | 6.63                    | 40.64 | 0.87    |

---

|                    |        |       |      |       |       |      |       |       |      |       |       |      |
|--------------------|--------|-------|------|-------|-------|------|-------|-------|------|-------|-------|------|
| Milk+Yogurt        | -13.13 | 24.04 | 0.59 | 13.55 | 16.93 | 0.42 | -6.82 | 48.66 | 0.89 | 31.03 | 34.12 | 0.36 |
| Milk+Yogurt+Cheese | -7.38  | 3.93  | 0.06 | -0.75 | 2.84  | 0.79 | -8.20 | 8.04  | 0.31 | 0.38  | 5.58  | 0.95 |

---

Models adjusted for age, sex, height, weight, current smoking, energy intake, calcium supplement use, vitamin D supplement use, physical activity, and multi-vitamin use.

\* *P*-value < 0.003 was considered statistically significant
